# Supplementary material for: Bypassing the bottlenecks in the shikimate and methylerythritol phosphate pathways for enhancing the production of natural products from methane in Methylotuvimicrobium alcaliphilum 20Z
Source: Royal Society of Chemistry journal article supplement (doi:10.1039/d2gc00077f), 2022-01-01
Supplement: d2gc00077f1.pdf [file d2gc00077f1.pdf]

## Electronic Supplementary Information (ESI)

### **Bypassing the bottlenecks in the shikimate and methylerythritol phosphate pathways for enhancing the production of natural products from methane in *Methylotuvimicrobium alcaliphilum* 20Z**

Diep Ngoc Pham,‡ Anh Duc Nguyen,‡ So Hyeon Oh, and Eun Yeol Lee\*

---

*Department of Chemical Engineering, Kyung Hee University, Yongin-si, Gyeonggi-do 17104, South Korea.*

\* Correspondence to: [eunylee@khu.ac.kr](mailto:eunylee@khu.ac.kr) (Tel: +82-31-201-3839; Fax: +82-31-204-8114)

‡ These authors contributed equally to this work.

Supplementary Figures

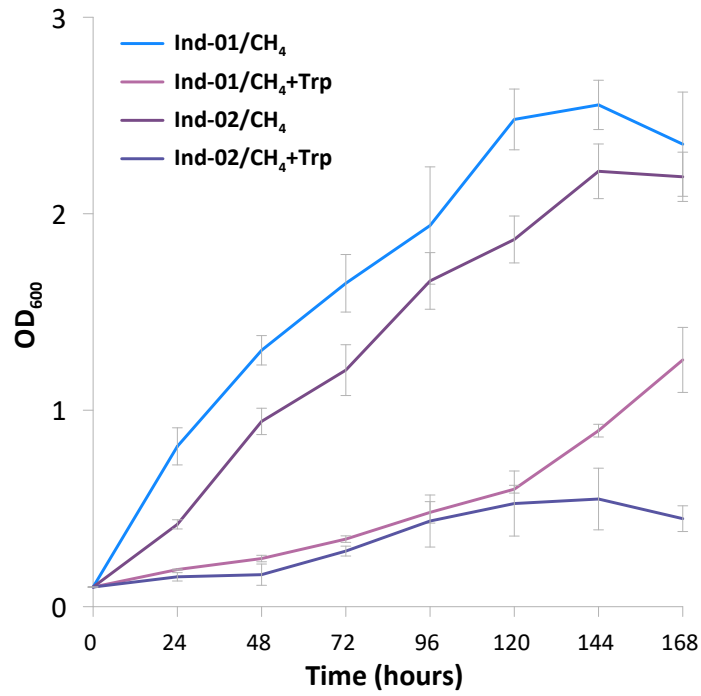

Figure S1. Growth profiles of Ind-01 and Ind-02 strains in medium supplied with methane or methane and 0.5 g/L of tryptophan.

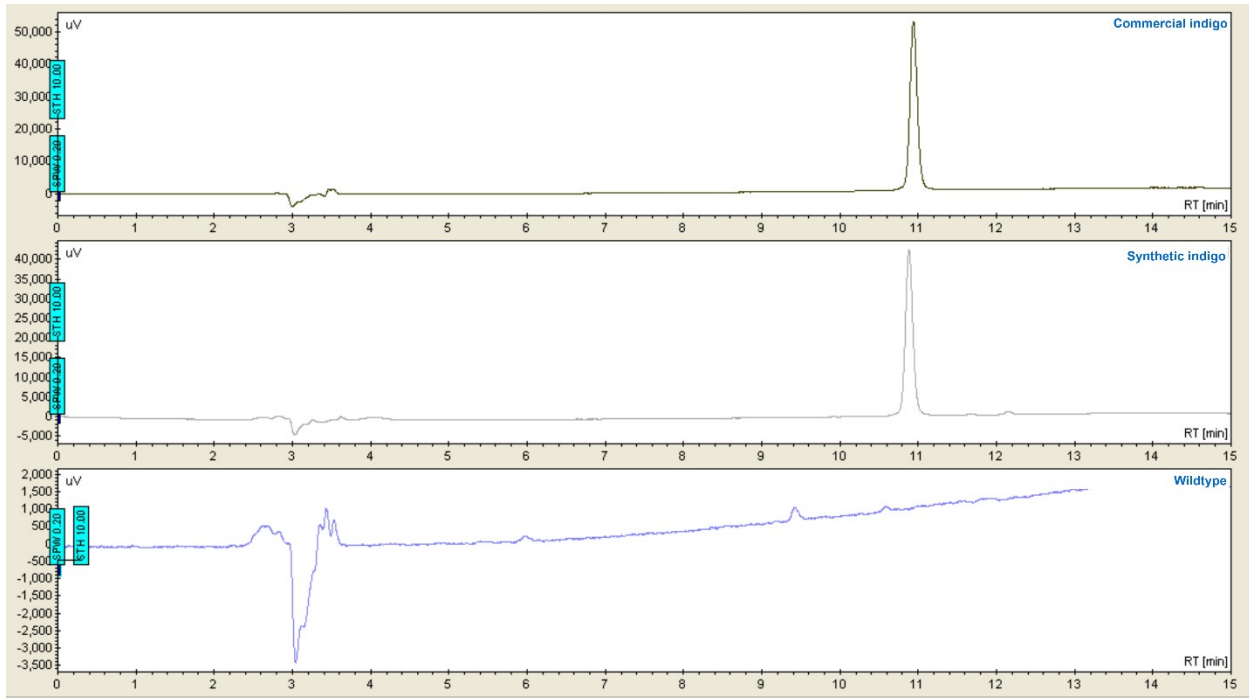

Figure S2. LC chromatograms of commercial indigo and synthetic indigo produced from Ind-03 strain.

```

      10      20      30      40      50      60      70      80
C. glutamicum  MEMVMKMKRVAIIGAGPSSGIAQLRAFESAEKQGHIEPELVCFEKQDTWGGQWNYSWRTGTDSYGEPVHSSMYRNLWSNGP
M. aminisulfidivorans  ----MATRIAILGAGPSSGMAQLRAFQSAQEKGAIEPELVCFEKQADWGGQWNYTWRTGLDENGEPVHSSMYRYLWSNGP
Clustal Consensus  .*:**:*:*****:*****:*:.* *****  *****:**** *. *****  *****

      110     120     130     140     150     160     170     180
C. glutamicum  SYPPREVLWDYIAGRRAKKSNEKYIKFAHVVRWVSFDEATKLFVTVTENLRTGETSSDITYDNVIVGAGHFSFPNVPHFDG
M. aminisulfidivorans  SYPPREVLWDYIKGRVEKAGVRKYIRENTAVRHVEFNEDSQTFVTVQDHTDITIYSEEFDYVVCCTGHFSTFYVPEFEG
Clustal Consensus  ***** **.:*:*:*:*  .** *:*:* :. *****: *  * : : * * : :***** * *.:*

      210     220     230     240     250     260     270     280
C. glutamicum  ADKDLLIGASYSIEDIGTQAYKMGARSVTFYSRNPNGYEWPEEMTELPLVERFDGSEVHFVNGEKRKVDIVVFCGTGYL
M. aminisulfidivorans  KDKTVLLVGSYSIEDIGSQCYKYGAKKLISCYRTAPMGYKWPENWDERPNLVRVDTENAYFADGSSEKVDAILLCTGYI
Clustal Consensus  ** :*:*.*****:*:* **.:. :.*: *****:***: * * : * * .:.*:.*.*** :.:*****:

      310     320     330     340     350     360     370     380
C. glutamicum  DTLYRGVVSSEANNQLFWLGAQDQWLTFNMFDAQAWYVRDVILGRVALPSKEAQRNHMQWLSRFEGLKSENDQIDFQCDY
M. aminisulfidivorans  LNLKGVVWEDNPKFFYIGMQDQWYSFNMFDAQAWYARDVIMGRLLPSPKEEMKADSMARREKELTLVTAEMEYTYQGDY
Clustal Consensus  .**:* ** * :.:*:* ***** :*****:*****:*:***** :. * .: * : : : * **

      410     420     430     440     450     460     470
C. glutamicum  ILKGWVKSKEEDILNRYDYTYTSVMTGTTSEVHHTFWMIELDDSLERYLSEFPQDEARQVYRKVKVRDKA
M. aminisulfidivorans  TFLKWKHHKKNIMTFRDHSYRSIMTGTMAPKHHTFWIDALDDSLAYLSDKSE-----IPVAKEA
Clustal Consensus  : * : *:*:.*:.*:* *:* **.: ***** : :*****: ***** ***: .* * :.*

```

Figure S3. Sequence alignment of Fmo from *C. glutamicum* and *M. aminisulfidivorans*.

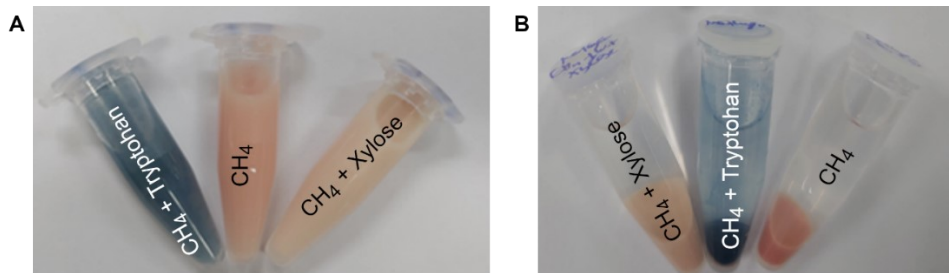

Figure S4. Culture broth of Ind-04 strain in methane, methane plus xylose and methane plus tryptophan before (A) and after (B) centrifugation.

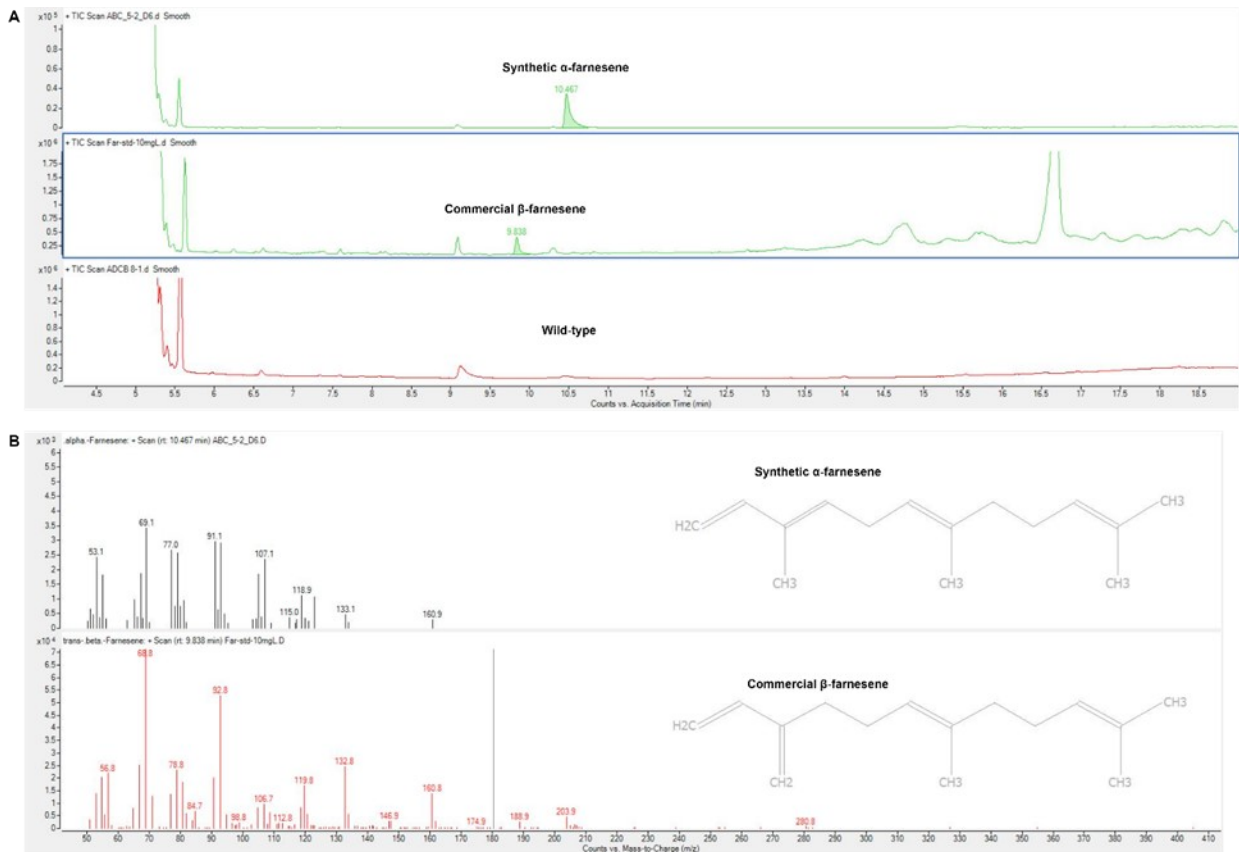

Figure S5. GC chromatograms (A) and mass spectrum chromatograms (B) of synthetic  $\alpha$ -farnesene and commercial  $\beta$ -farnesene.

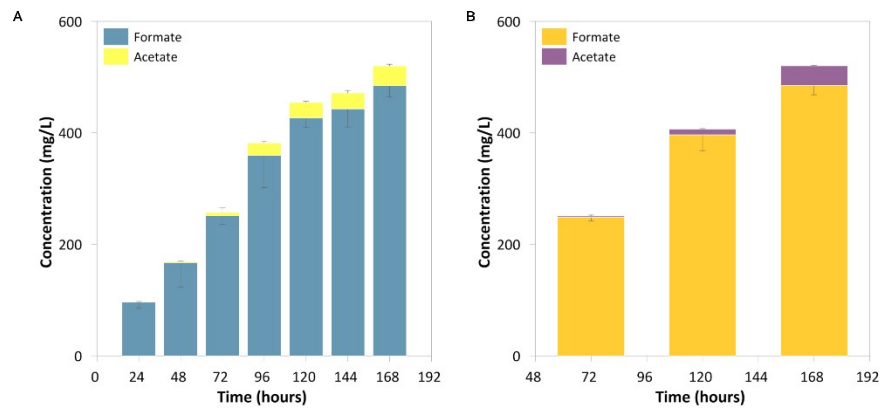

Figure S6. Excretion of organic acids including formate and acetate during cultivation of engineered strains Ind-05 (A) and FAR-02 (B) on methane.

## Supplementary Tables

Table S1. Strains and plasmids used in this study

| Strain                                       | Characteristic                                                                                                       | Reference  |
|----------------------------------------------|----------------------------------------------------------------------------------------------------------------------|------------|
| <i>Escherichia coli</i> DH5 $\alpha$         |                                                                                                                      | Novagen    |
| <i>Corynebacterium glutamicum</i>            |                                                                                                                      | KCTC       |
| <i>Methylophaga aminisulfidivorans</i>       |                                                                                                                      | KCTC       |
| <i>Methylotuvimicrobium alcaliphilum</i> 20Z | Used as host strain                                                                                                  | DMSZ       |
| Ind-01                                       | <i>M. alcaliphilum</i> 20Z harboring pFMO-Cg plasmid                                                                 | This study |
| Ind-02                                       | <i>M. alcaliphilum</i> 20Z harboring pFMO-Ma plasmid                                                                 | This study |
| Ind-03                                       | <i>M. alcaliphilum</i> 20Z harboring pFMO-Ma-A plasmid                                                               | This study |
| Ind-04                                       | <i>M. alcaliphilum</i> 20Z harboring pFMO-Ma-T plasmid                                                               | This study |
| Ind-05                                       | <i>M. alcaliphilum</i> 20Z harboring pFMO-Ma-AT plasmid                                                              | This study |
| Ind-06                                       | <i>M. alcaliphilum</i> 20Z harboring pFMO-Ma-AT plasmid with chromosomally integrated xylose-utilizing pathway genes | This study |
| FAR-01                                       | <i>M. alcaliphilum</i> 20Z harboring pAFS plasmid                                                                    | This study |
| FAR-02                                       | <i>M. alcaliphilum</i> 20Z harboring pAFS-nDXP plasmid                                                               | This study |

|                      |                                                                                                                    |                                 |
|----------------------|--------------------------------------------------------------------------------------------------------------------|---------------------------------|
| FAR-03               | <i>M. alcaliphilum</i> 20Z harboring pAFS-nDXP plasmid with chromosomally integrated xylose-utilizing pathway gene | This study                      |
| <b>Plasmid</b>       |                                                                                                                    |                                 |
| pAWP89               | oriV oriT trfA ahp dTomato pTac                                                                                    | Puri et al. 2015 <sup>1</sup>   |
| pCM351-XYL           | pCM351-(FR)glgA containing construct for integrating $P_{tac}$ - <i>xyfAB-rpe</i> into chromosome                  | Nguyen et al. 2021 <sup>2</sup> |
| pBs-02               | pAWP89-based backbone carrying <i>AgBS-ispA-dxs-ispG-ribB-DSAG-dxr</i>                                             | Nguyen et al. 2021 <sup>3</sup> |
| pET-28a(+)           | Expression vector with N-terminal His-tag                                                                          | Novagen                         |
| pET-tna              | pET-28a carrying <i>tnaA</i>                                                                                       | This study                      |
| pET-tna-Mfmo         | pET-28a carrying <i>tnaA</i> and <i>fmo</i> from <i>M. aminisulfidivorans</i>                                      | This study                      |
| pET-tna-Cfmo         | pET-28a carrying <i>tnaA</i> and <i>fmo</i> from <i>C. glutamicum</i>                                              | This study                      |
| pET-Trp              | pET-28a carrying <i>aroG</i> <sup>D146N</sup> and <i>trpE</i> <sup>S40F</sup>                                      | Pham et al. 2022 <sup>4</sup>   |
| pET-indigo-trpE      | pET-28a carrying <i>tna-Mfmo-trpE</i> <sup>S40F</sup>                                                              | This study                      |
| pET-indigo-aroG-trpE | pET-28a carrying <i>tna-Mfmo-aroG</i> <sup>D146N</sup> - <i>trpE</i> <sup>S40F</sup>                               | This study                      |
| pFMO-Cg              | pAWP89-based backbone carrying $P_{tac}$ promoter and <i>tna-Cfmo</i> amplified from pET-28a-tna-Cfmo plasmid      | This study                      |
| pFMO-Ma              | pAWP89-based backbone carrying $P_{tac}$ promoter and <i>tna-Mfmo</i> amplified from pET-28a-tna-Mfmo plasmid      | This study                      |

|            |                                                                                                                                                                           |            |
|------------|---------------------------------------------------------------------------------------------------------------------------------------------------------------------------|------------|
| pFMO-Ma-A  | pAWP89-based backbone carrying $P_{tac}$ promoter and <i>tna-Mfmo-aroG</i> <sup>D146N</sup> amplified from pET-28a-indigo-aroG-trpE plasmid                               | This study |
| pFMO-Ma-T  | pAWP89-based backbone carrying $P_{tac}$ promoter and <i>tna-Mfmo-trpE</i> <sup>S40F</sup> amplified from pET-28a-indigo-trpE plasmid                                     | This study |
| pFMO-Ma-AT | pAWP89-based backbone carrying $P_{tac}$ promoter and <i>tna-Mfmo-aroG</i> <sup>D146N</sup> - <i>trpE</i> <sup>S40F</sup> amplified from pET-28a-indigo-aroG-trpE plasmid | This study |
| pAFS       | pAWP89-based backbone carrying $P_{tac}$ promoter <i>afs</i> and <i>ispA</i>                                                                                              | This study |
| pAFS-nDXP  | pAWP89-based backbone carrying $P_{tac}$ promoter <i>afs</i> and <i>ispA</i> and <i>ribB-DSAG-dxr</i> amplified from pBs-02 plasmid                                       | This study |

Table S2. Primers used in this study

| Primers       | Primer sequences (5'-3')                                                     | Description                                                                                                                                                                                                            |
|---------------|------------------------------------------------------------------------------|------------------------------------------------------------------------------------------------------------------------------------------------------------------------------------------------------------------------|
| pAWP89_fw     | TAGTTGTCGGGAAGATGCG                                                          | For amplifying pAWP89 backbone, in which promoter $P_{tac}$ and SD were kept.                                                                                                                                          |
| pAWP89_rv     | AGCTGTTTCTGTGTGAATA                                                          |                                                                                                                                                                                                                        |
| afs_fw        | aggtattcacacaggaacagctATGGAATTTCTGGGTTTCAT                                   | For amplifying <i>afs</i> gene from synthetic <i>afs</i> fragment to ligate to <i>ispA</i> and pAWP89 backbone, resulting in pAFS plasmid.                                                                             |
| afs_rv        | agaggtactcagagaCTAGTTAACCAACGGTTG                                            |                                                                                                                                                                                                                        |
| ispA_fw       | caaccgttggttaactagGATCTGAGTACCTCTAGAAAATAAGGAGCAATCCAATG<br>AGTAACGCACTGAAAG | For amplifying <i>ispA</i> gene from genomic DNA of <i>M. alcaliphilum</i> 20Z to ligate to <i>afs</i> and pAWP89 backbone, resulting in pAFS plasmid.                                                                 |
| ispA_rv       | gcatcttcccacaactaTTAATGATCTCGCTGGAT                                          |                                                                                                                                                                                                                        |
| pAWP89_fw     | TAGTTGTCGGGAAGATGCG                                                          | For amplifying pAFS backbone, in which promoter $P_{tac}$ , SD, <i>ispA</i> , and <i>afs</i> genes were kept.                                                                                                          |
| pAWP89_Far_rv | TTAATGATCTCGTGGATAATA                                                        |                                                                                                                                                                                                                        |
| ribBC_fw      | atccagcgagatcattaaTTCACACAGGAAACAGCTATGAATCAGACGCTACTT                       | For amplifying <i>ribB-DSAG-dxr</i> fragment from pBs-02 plasmid, which was constructed by our group in previous study (Nguyen et al. 2021) <sup>3</sup> , to ligate to pAFS backbone, resulting in pAFS-nDXP plasmid. |
| ribBC_rv      | gcatcttcccacaactaTTAACGCTTAAGTTCTTCGAC                                       |                                                                                                                                                                                                                        |
| tnaA_fw       | gacagcaaatgggtcgcgATGAAAACTTTAAACATCTCC                                      | For amplifying <i>tnaA</i> gene from genomic DNA of <i>E. coli</i> to ligate to pET-28a at BamHI restriction site, resulting in pET-28a-tna plasmid.                                                                   |

|            |                                                                   |                                                                                                                                                                           |
|------------|-------------------------------------------------------------------|---------------------------------------------------------------------------------------------------------------------------------------------------------------------------|
| tnaA_rv    | cgacggagctcgaattcgTAAACTTCTTTAAGTTTTGCG                           |                                                                                                                                                                           |
| Mfmo_fw    | acttaaagaagttaacgTATTCACACAGGAAACAGCTATGGCAACTCGTATTGCG           | For amplifying <i>fmo</i> gene from genomic DNA of <i>M. aminisulfidivorans</i> to ligate to pET-28a-tna at SacI restriction site, resulting in pET-28a-tna-Mfmo plasmid. |
| Mfmo_rv    | gcttgtcgacggagctcgTTAAGCTTCTTTAGCCACAG                            |                                                                                                                                                                           |
| Cfmo_fw    | acttaaagaagttaacgTATTCACACAGGAAACAGCTATGAAGAATAAGCGCGTT           | For amplifying <i>fmo</i> gene from genomic DNA of <i>C. glutamicum</i> to ligate to pET-28a-tna at SacI restriction site, resulting in pET-28a-tna-Cfmo plasmid.         |
| Cfmo_rv    | gcttgtcgacggagctcgTTAGGCTTTATCGCGGAC                              |                                                                                                                                                                           |
| trpE_fw    | gacagcaaatgggtcgcgTATTCACACAGGAAACAGCTATGCAAACACAAAAACC<br>GACTCT | For amplifying <i>trpE<sup>fbr</sup></i> from pET-Trp to ligate to pET-tna-Mfmo at NotI restriction site, resulting in pET-28a-Ma-T plasmid.                              |
| trpE_rv    | gcttgtcgacggagctcgTCAGAAAGTCTCTGTGC                               |                                                                                                                                                                           |
| aroG_fw    | gacagcaaatgggtcgcgTATTCACACAGGAAACAGCTATGAATTATCAGAACGA<br>CGA    | For amplifying <i>aroG<sup>fbr</sup>-trpE<sup>fbr</sup></i> from pET-Trp to ligate to pET-tna-Mfmo at NotI restriction site, resulting in pET-28a-Ma-AT plasmid.          |
| trpE_rv    | gcttgtcgacggagctcgTCAGAAAGTCTCTGTGC                               |                                                                                                                                                                           |
| tnaA_89_fw | ttcacacaggaaacagctATGGAAAACCTTTAAACATCTCC                         | For amplifying <i>tnaA-Mfmo</i> cluster gene from pET-28a-tna-Mfmo plasmid to ligate to pAWP89 backbone, resulting in pFMO-Ma plasmid.                                    |
| Mfmo_89_rv | gcatcttcccgacaactaTTAAGCTTCTTTAGCCACAG                            |                                                                                                                                                                           |
| tnaA_89_fw | ttcacacaggaaacagctATGGAAAACCTTTAAACATCTCC                         | For amplifying <i>tnaA-Cfmo</i> cluster gene from pET-28a-tna-Cfmo plasmid to ligate to pAWP89 backbone, resulting in pFMO-Cg plasmid.                                    |
| Cfmo_89_rv | gcatcttcccgacaactaTTAGGCTTTATCGCGGAC                              |                                                                                                                                                                           |
| tnaA_89_fw | ttcacacaggaaacagctATGGAAAACCTTTAAACATCTCC                         | For amplifying <i>tnaA-Mfmo-aroG</i> cluster gene from pET-28a-indigo-aroG-trpE plasmid to ligate to pAWP89 backbone, resulting in pFMO-Ma-AT plasmid.                    |
| aroG_89_rv | gcatcttcccgacaactaTTACCCGCGACGCGCTTTTA                            |                                                                                                                                                                           |
| tnaA_89_fw | ttcacacaggaaacagctATGGAAAACCTTTAAACATCTCC                         | For amplifying <i>tnaA-Mfmo-trpE</i> cluster gene from pET-28a-indigo-trpE plasmid to ligate to pAWP89 backbone, resulting in pFMO-Ma-AT plasmid.                         |
| trpE_89_rv | gcatcttcccgacaactaTCAGAAAGTCTCTGTGC                               |                                                                                                                                                                           |
| tnaA_89_fw | ttcacacaggaaacagctATGGAAAACCTTTAAACATCTCC                         | For amplifying <i>tnaA-Mfmo-aroG-trpE</i> cluster gene from pET-28a-indigo-aroG-trpE plasmid to ligate to pAWP89 backbone, resulting in pFMO-Ma-AT plasmid.               |
| trpE_89_rv | gcatcttcccgacaactaTCAGAAAGTCTCTGTGC                               |                                                                                                                                                                           |

Homologous sequences used for Gibson Assembly are indicated by lower-case. Ribosome binding sites are underlined.

Table S3. Sequence of homologous genes used in this study



| Gene                           | Sequence                                                                                                                                                                                                                                                                                                                                                                                                                                                                                                                                                                                                                                                                                                                                                                                                                                                                                                                                                                                                                                                                                                                                                                                                                                                                                                                                                                                                                                                                                                                              |
|--------------------------------|---------------------------------------------------------------------------------------------------------------------------------------------------------------------------------------------------------------------------------------------------------------------------------------------------------------------------------------------------------------------------------------------------------------------------------------------------------------------------------------------------------------------------------------------------------------------------------------------------------------------------------------------------------------------------------------------------------------------------------------------------------------------------------------------------------------------------------------------------------------------------------------------------------------------------------------------------------------------------------------------------------------------------------------------------------------------------------------------------------------------------------------------------------------------------------------------------------------------------------------------------------------------------------------------------------------------------------------------------------------------------------------------------------------------------------------------------------------------------------------------------------------------------------------|
| <i>tnaA (E. coli K12)</i>      | <p>ATGGAAAACCTTTAAACATCTCCCTGAACCGTTCCGCATTCTGTTATTGAGCCAGTAAAACGTACCCTCGCGCTTATCGTGAAGAGGCAATTATTAATCCGGTAT<br/> GAACCCGTTCTGCTGGATAGCGAAGATGTTTTATCGATTTACTGACCGACAGCGGCACCGGGGCGGTGACGCAGAGCATGCAGGCTGCGATGATGCGCGGCG<br/> ACGAAGCCTACAGCGGCAGTCTGACTACTATGCGTTAGCCGAGTCACTGAAAAATATCTTCGTTATCAATACACCATTCCGACTACCAGGGCCGTGGCGCAG<br/> AGCAAATCTATATCCGGTACTGATTA AAAAACGCGAGCAGGAAAAAGGCTGGATCGCAGCAAAATGGTGGCGTTCTAACTATTTCTTGATACCACGCAGG<br/> GCCATAGCCAGATCAACGGCTGTACCGTGCCTAACGTCTATATCAAAGAAGCCTTCGATACGGGCGTGCCTACGACTTTAAAGGCAACTTTGACCTTGAGGGAT<br/> TAGAACGCGGTATTGAAGAAGTTGGTCCGAATAACGTGCCGTATATCGTTGCAACCATACCAGTAACTCTGCAGGTGGTCAGCCGGTTTCACTGGCAAACCTAA<br/> AAGCGATGTACAGCATCGCGAAGAAATACGATATTCCGGTGGTAATGGACTCCGCGCGCTTTGCTGAAAACGCCTATTTCAATTAAGCAGCGTGAAGCAGAATACA<br/> AAGACTGGACCATCGAGCAGATCACCCGCGAAACCTACAAATATGCCGATATGCTGGCGATGTCCGCCAAGAAAGATGCGATGGTGCCGATGGGCGGCGCTGCTG<br/> TGATGAAAGACGACAGCTTCTTTGATGTGTACACCGAGTGCAGAACCCTTTGCGTGGTGCAGGAAGGCTTCCCGACATATGGCGGCTAGAAGGCGGCGCGAT<br/> GGAGCGTCTGGCGGTAGGTCTGTATGACGGCATGAATCTCGACTGGCTGGCTTATCGTATCGCGCAGGTACAGTATCTGGTGCATGGTCTGGAAGAGATTGGCG<br/> TTGTCTGCCAGCAGGCGGCGGTACGCGGCATTCTGTTGATGCCGTAACCTGTTGCCGCATATCCCGCAGACCAGTCCCGGCAACAGGCCTGGCCTGCGAG<br/> CTGTATAAAGTCGCCGTATCCGTGCGGTAGAAATTGGCTCTTCTGTTAGGCCGATCCGAAAACCGGTAAACAACCTGCCATGCCGGCTGAACTGCTGCGTT<br/> TAACCATTCCGCGCGCAACATATACTCAAACACATATGGACTTCATTATTGAAGCCTTTAAACATGTGAAAGAGAACGCGGCGAATATTAAGGATTAACCTTTAC<br/> GTACGAACCGAAAGTATTGCGTCACTTACCAGCAAACCTAAAGAAGTTTAA</p> |
| <i>Cfmo (C. glutamicum)</i>    | <p>ATGGAGATGGTTATGAAGAATAAGCGCGTTGCGATTATTGGTGCAGGTCCGAGTGGTATCGCTCAGTTGAGGGCGTTTGTAGTCTGCTGAAAAGCAGGGTCAATGA<br/> GATCCCTGAGCTGGTGTGTTTTGAAAAGCAGGATACTGGGGTGGGCGAGTGAATTAATCTTGGCGCACGGGAACAGACTCTTATGGTGAGCCTGTGCACTCAA<br/> GTATGTACCGAAACCTGTGGTCAAACCGTCCGAAGGAAGTCTCGAATTTGCTGAGTACAGCTTCGATGAGCACTTCGAAAGCCAATTTCTTACCCTCCACG<br/> TGAAGTGTGGGATTACATTGCAGGTCGTGCAAAGAAGTCAACGTTGAGAAGTATCAAGTTCCGCGCATGTTGTTGCTGGGTGAGTTTTGATGAGGCCAC<br/> CAAGCTGTTACCGTGACGGTGGAGAACCTCCGACCGGTGAGACCAGCAGTGTACTTATGACAACGTGATTGTTGGCGCTGGACACTTCAGTTTCCCGAACGT<br/> CCCTCACTTTGATGGTGTGGAGACTTCCCAAGTCCAGATCATGCATGCTCACGAGTCCGTTGGTGCAGAGGCTGTTGCTGACAAGGATATTTGCTGATTGGTGCA<br/> AGTTATTCTGCGGAAGATATCGGTACCCAGGCGTACAAGATGGGTGCTCGTTCCGTTGACTTCTTACCCTCAAACCAATGGGGTATGAGTGGCCTGAAGAG<br/> ATGACTGAGCTTCTTTGGTTGAGCGTTTCGATGGCTCCGAGGTTCACTTTGTCAATGGTAAAAGCGCAAGGTTGACATCGTGGTGTCTGTACTGGTACTTAC<br/> ACCATTACCATTTATGCCGTCTGAGCTGACTTTAAGCTCACCAACAACCTGTACCCGGATACGCTTTATCGTGGCGTGGTGTCCGAGGCTAATAACCAGCTGTT<br/> TGTTGGGCGCTCAGGATCAGTGGCTGACGTTCAACATGTTTGTGCTCAGGCTGGTATGTTCCGCGATGTCATTTGGGTGCGTGGCTCTTCCCTTCAAGGAGG<br/> CGCAGCGCAATCATATGGATCAGTGGCTGTCACGTTTTGAGGGTTTGAAGTCTGAGAATGATCAGATTGATTCCAGTGCGATTACGTTGAGGACCTCATTGACCA<br/> GACCGATTACCCTTCTGTTGATCTGAAGGAAGTTGCAATATCTTGAAGGGCTGGGTGAAGTCAAGGAGGAGGATATCCTCAACTACCGGATTACACCTACAC<br/> GTCCGTGATGACTGGCACTACCTCTGTTGAGCACCACACTCCGTGGATGATTGAGTTGGATGATTCTTGGAGCGTTACCTCAGCGAGCCTCAGGAAGATGAAGC<br/> TCGTGAGTTTACCCTGGCAAGAAAGTCCGCGATAAAGCCTAA</p>               |
| <i>Mfmo aminosulfidivorans</i> | (M.<br>221 724 891 868) <p>ATGGCAACTCGTATTGCGATACTGGTGCAGGCCAAGTGGTATGGCACAACCTCAGAGCATTCCAATCCGCCAGGAAAAAGGTGCTGAGATCCCTGAACTCGTT<br/> TGTTTTGAAAAACAAGCTGATTGGGGCGGCCAGTGAATACACATGGCGCACTGGTTAGATGAAAATGGCGAACCTGTTATAGCAGTATGTATCGTATCTG<br/> TGGTCAAACGGCCGAAAAGAATGCTTGAATTTGCTGATTACACGTTTACGAAACACTTTGGTAAGCCCATCGCTCTTATCCACCCCGTGAAGTCTTATGGGACT<br/> ATATTAAGGCCGTGTTGAAAAAGCCGGCGTCAGAAAATATATCCGTTTTAATACCGCTGTTGTCATGTTGAATTCACGAAGACAGCCAAACTTTTACCGTTAC<br/> CGTGCAGGACCATACTACTGACACAATTACTCTGAAGAGTTTACTATGTTGTCTGTTGACCGGTCACCTCTCAACACCTTACGTGCCTGAATTTGAAGGCTTTG<br/> AAAATTTGGTGGCCGATTCTGCATGCCATGACTCCGTGACGCATTAGAATTTAAAGACAAAACCTGATTACTGGTGGCAGCAGTACTCAGCTGAAGATAT<br/> CGGCTACAATGTTATAAATACGGCGCGAAAAACTGATCAGCTGCTACCGTACCGCACCGATGGGTTATAAATGGCCTGAAAACCTGGGATGAAAGACCCAACT<br/> GGTTCGTGTTGATACTGAAAACGCTTATTTGCCGATGTTTATCAGAAAAAGTCGATGCGATTATCTGTGTACCGGTTATATCCATCACTTCCCTTCTCAATGA</p>                                                                                                                                                                                                                                                                                                                                                                                                                                                                                                                                                                                                         |

---

CGATCTGCGTCTGGTACCAATAACCGTTTTATGGCCGCTCAACCTTTATAAAGGCGTGGTGTGGGAAGATAATCCAAAATTCTTCTACATTGGCATGCAGGATCAA  
TGGTACAGCTTCAATATGTTTGATGCCCAAGCTGGTATGCCCGTATGATGATTATGGGTCGACTGCCATTGCCATCAAAAAGAAGAGATGAAAGCCGACAGCATG  
GCCTGGCGTAAAAAGAAGTACGCTGGTTACGGCTGAAAGAAATGTACACCTACCAGGTGACTACATTCAGAATCTGATTGATGACTGACTATCCGTCATTT  
GATATTCGGCAACCAACAAAACCTTTCTGGAATGGAAACATCACAAAAAGAAAACATCATGACTTTCCGTGACCACTCATACCGTTCACTGATGACTGGCACGA  
TGGCACCGAAACATCACACCATGGATAGATGCACTGGATGATTCTCTGGAAGCTATCTCTGATAAGAGCGAAATTCCTGTGGCTAAAGAAGCTTAA

---

*aroG*<sup>fbr(D146N)</sup>

ATGAATTATCAGAACGACGATTTACGCATCAAAGAAATCAAAGAGTTACTTCTCTGTGCGATTGCTGGAAAAATCCCCGCTACTGAAAATGCCGCGAATACGG  
TTGCCATGCCGAAAAGCGATCCATAAGATCCTGAAAGGTAATGATGATCGCCTGTTGGTGTGATTGGCCCATGCTCAATTCATGATCCTGTGCGGGCAAAGA  
GTATGCCACTCGCTTGTGCGCTGCGTGAAGAGCTGAAAGATGAGCTGAAATCGTAATGCGCGTCTATTTTGAAAAGCCGCGTACCACGGTGGGCTGAAAAG  
GGCTGATTAACGATCCGCATATGGATAATAGCTCCAGATCAACGACGGTCTGCGTATAGCCCGTAAATTGCTGCTTATTAACGACAGCGGTCTGCCAGCGG  
CAGGTGAGTTTCTCAATATGATCACCCACAATATCTCGTGACCTGATGAGCTGGGGCGCAATTGGCGCACGTACCACCGAATCGCAGGTGCACCGCAACTGG  
CATCAGGGCTTTCTGTCCGGTGGGCTTCAAAAATGGCACCGACGGTACGATTAAGTGGCTATCGATGCCATTAATGCCGCCGTGCGCCGCACTGCTTCTGTG  
CGTAACGAAATGGGGCATTGCGGATTGTGAATACCAGCGGTAACGGCGATTGCCATATCATTCTGCGCGCGGTAAAGAGCCTAACTACAGCGCGAAGCACG  
TTGCTGAAGTGAAGAAGGGCTGAACAAAGCAGGCTGCCAGCACAGGTGATGATCGATTTACGCCATGCTAACTCGTCCAAACAATTCAAAAAGCAGATGGAT  
GTTTGTGCTGACGTTTCCAGCAGATTGCCGGTGGCGAAAAGGCCATTATTGGCGTATGGTGGAAAGCCATCTGGTGAAGGCAATCAGAGCCTCGAGAGCG  
GGGAGCCGCTGGCTACGGTAAGAGCATCACCGATGCCTGCATCGGCTGGGAAGATACCGATGCTCTGTTACGTCAACTGGCGAATGCAGTAAAGCGCGTCCG  
GGTAA

---

*trpE*<sup>fbr(S40F)</sup>

ATGCAAAACAAAAACCGACTCTCGAAGTCTAACCTGCGAAGGCGCTTATCGCGACAATCCCACCGCGCTTTTACCAGTTGTGTGGGGATCGTCCGGCAACGC  
TGCTGCTGGAATTCGAGATATCGACAGCAAAGATGATTTAAAAAGCCTGCTGCTGGTAGACAGTGCCTGCGCATTACAGCTTTAGGTGACTGTCACAATCC  
AGGCACTTTCCGGCAACGGCGAAGCCCTCTGGCACTACTGGATAACGCCCTGCTGCGGGTGTGGAAAGTGAACAATCACCAACTGCCGTGTGCTGCGCTTCC  
CCCTGTCACTCACTGCTGGATGAAGACGCCCCGTTATGCTCCCTTTGCGTTTTGACGCTTTCCGTTTATTGCAGAATCTGTTGAATGTACCGAAGGAAGAACA  
GAAGCCATGTTCTTCCGCGCCCTGTTCTTATGACCTTGTGGCGGATTTGAAGATTTACCGCAACTGTCAGCGGAAAATAACTGCCCTGATTTCTGTTTTATCT  
CGTGAACGCTGATGGTATTGACCATCAGAAAAAAGCACCCGATTTCAGGCCAGCCTGTTTGTCCGAATGAAGAAGAAAAACAACGCTCACTGCTCGCTC  
GAACGAACTACGTCACTGCAACTGACCGAAGCCGCGCCGCGCTGCCAGTGGTTTTCCGTGCCGATATGCGTTGTGAATGTAATCAGAGCGATGAAGATTGGTG  
GCGTAGTGCCTTTGTGCAAAAAGCGATTGCGCTGGAGAAATTTCCAGGTGGTGCATCTCGCCGTTTCTCTGCCCTGCCGTCACCGCTGGCGCCTATTA  
CGTGTGAAAAAGAGTAATCCCAGCCCGTACATGTTTTTATGCAAGATAATGATTTACCCTATTTGGCGCTGCGCGGAAAGCTCGCTCAAGTATGATGCCACC  
AGCCGCCAGATTGAGATCTACCGATTGCCGAACACGCCACGCGTCTGCGCCGATGGTTCACTGGACAGAGATCTCGACAGCCGTATTGAACTGGAAT  
GCGTACCGATCATAAAGAGCTGTCTGAACATCTGATGCTGGTTGATCTCGCCGTAATGATCTGGCACGATTTGCACCCCGGACGCGCTACGTCGCCGATCTC  
ACCAAAGTTGACCGTTATTCTATGTGATGCACCTGCTCTGCGGTAGTCCGGCAACTGCGTCACGATCTTGACGCCCTGCACGCTTATCGCGCCTGTATGAATAT  
GGGACGTTAAGCGGTGCGCCGAAAGTACGCGCTATGCAGTTAATTGCCGAGCGGAAGGTGCTGCGCCGCGGACGCTACGGCGCGCGGTAGGTTATTTACC  
GCGCATGGCGATCTCGACACCTGCATTGTGATCCGCTCGCGCTGGTGGAAAACGGTATCGCCACCGTGAAGCGGGTGTGGTGTAGTCTTGATTCTGTTCCG  
CAGTCGGAAGCCGACGAAACCCGTAACAAAGCCGCGCTGACTGCGCGCTATTGCCACCGCGCATCATGCACAGGAGACTTTCTGA

---

*afs* (codon-optimized)

ATGGAATTTCCGGTTCATTTGCAAGCCGATAACGAACAAAAATCTTTCAAACCAATGAAACCGGAACCGGAAGCCTCGTATTTGATCAACCAACGGCGGTG  
GCCAACTATAAACCGAACATCTGAAAAACGATTTTTGGATCAATCGTTGATCTCGAAATATGATGGCGATGAATATCGGAAATTGTCGAAAAATTGATCGAA  
GAAGTTAAAATCTATATCTCGGCCGAAACCATGGATTTGGTTGCCAAATTGGAATTGATCGATTCCGGTTCGAAATTGGGCTTGGCAACTGTTTAAAAAGAAA  
TCAAAGAAGCCTGGATTGATCGCCGCGCATCGAATCGGATAACTTTGGGCACCCGGGATGATTTGTATGGCACCGCCTTGCATTTTAAAATCTTGGCGCAACATGG  
CTATAAAGTTTCGCAAGATATCTTTGGCCGTTTATGGATGAAAAAGGCACCTTGGAAAACCATCATTTGCCATTTGAAAGGCATGTTGGAATTGTTGAAGCC  
TCGAACTTGGGCTTTGAAGGCGAAGATATCTTGGATGAAGCCAAAGCCTCGTTGACCTTGGCCTTGGGGATTGGGGCCATATCTGCTATCCGGATTGAACTTGT  
CGCGGGATGTTGTTTATTGTTGGAATTGCCGTCATCGCGGGTCAATGGTTTGTGTTAAATGGCAAATCAACGCTATGAAAAAGATATCTGCCGGTTA  
ACGCCACCTTGTGGAATTGGCAAATTGAACTTAACTGTTCAAGCCCAATTGCAAAAAAATTCGCGGAAGCCTCGCGTGGTGGGCCAATTGGGCTTTG

---

---

CCGATAACTTGAAATTTGCCCGGATCGGTTGGTTGAATGCTTTTCGTGCGCCGTTGGCGTTGCCTTTGAACCGGAACATTCGTCGTTTCGGATCTGCTTGACCAA  
AGTTATCAACTTGGTTTTGATCATCGATGATGTTTATGATATCTATGGCTCGGAAGAAGAATTGAAACATTTTACCAACGCCGTTGATCGTGGGATTTCGCGGGAA  
ACCGAACAATTGCCGGAATGCATGAAAATGTGCTTTCAAGTTTTGTATAACACCACCTGCGAAATCGCCCGGAAATCGAAGAAGAAAACGGCTGGAACCAAGTT  
TTGCCGCAATTGACCAAAGTTTTGGGCCGATTTTTGCAAAGCCTTGTGGTTGAAGCCGAATGGTATAACAAATCGCATATCCCGACCTTGGAAAGAAATTTGCGGA  
ACGGCTGCATCTCGTCGTCGTTTCGGTTTTGTTGGTTCAATCGTTTTTCGATCACCATGAAGGCACCAAAGAAATGGCCGGCTTTTTGCATAAAAACGAAGAT  
TTGTTGTATAACATCTCGTTGATCGTTTCGGTTGAACAACGATTTGGGCACCTCGGCCGCCGAACAAGAACGGGGCGATTTCGCCGTCGTCGATCGTTTGCTATATGC  
GGGAAGTTAACGCCTCGGAAGAAACCGCCGGAAAAACATCAAAGGCATGATCGATAACGCCTGGAAAAAGTTAACGGCAATGCTTTACCACCAACCAAGTT  
CCGTTTTTGTGTCGTTTATGAACAACGCCACCAACATGGCCGGGTTGCCATTCTGTTGATAAAGATGGCGATGGCTTTGGCGATCAAGAAAAAGGCCCGCG  
ACCCATATCTTGTGCTTGTGTTTCAACCGTTGGTTAACTAG

---

*ispA* (*M. alcaliphilum*  
20Z)

ATGAGTAACGCACTGAAAGACTATCTCTCTTTTGTCAAACCGTGTGCAAGAGCCTTGAAGCCCGACTGCCAAGCGAAAACCAAATTCGACAAAATTCGAC  
GAAGCGATGCGCTATTGCGTGCTGGACGGCGTAAACGCATGCGTCCGATGCTAACCTACTGTACAGGAAAAGCCGTGGGCATTGCACCGGAAGATTTAGATGG  
CGCGCCTGTGCGGTTGAATTCATCATGTTTATTCTGTTGATACATGACGATTTGCCGGCCATGGACGACGACGACCTCAGACGCGGAAAAGCCGACCTGTATATC  
GCTTATGATGAAGCGACCGCATTGACCGGCGACGCTTACAAGCATTGGCATTCAAGGTCTTGGCTGACGACCCTACCATCCGAGCCGATGCCGAAAGCCGT  
CTAAAAATGATTACGTTGCTGGCTAAGGCTAGCGGCTCTCAAGGCATGGTCGGCGCAAGCCATCGATTTAGAATCGGTCGGCACGATGCTGACGCTGCCTCAG  
CTTGAANAATATGCATATCCACAAGACCGGAGCGTTAATTCGAGCCAGCGTCAACATGGCGACGTTAACGAGACCCGATATCGACCGAAAACAGCCGAAGGGCT  
CGATCATTACGCAAAATGCATCGGCCTATCCTTCCAAGTCAAGGATGATTTTTGGACGAAGAAAGCGATACCGCAACACTCGGCAAAACCAAGGCAAGGACAA  
AGACAACGACAAGCCGACTTACCCTGCCTTACTCGGCTTGGCCGGCGCAAAGCAAAAAGCTCAGGAATTCATGAGCAAGCCATTGAAAGCTTAAACGGATTCCG  
CCCCGAAGCCGATCTGCTTGTGACTTGTGCTTTATATTATCCAGCGAGATCATTA

---

*ribB*<sup>G1135 3</sup>

ATGAATAATGTCGAAAAGGCGATCGAAGCGTTGAAAAAAGGCGAGATCATTTTTGGTTTACGATAGCGATGAACGCGAGGGCGAAACCGATATGGTGGTCGCGT  
CGCAATTTATCACGCCGGAACATATCCGCATCATGCGCAAAGATGCCGGCGGCTTGATTTGTACCGCATTGCATCCGGACATCTGCAATAAATGGGCATTCCGTT  
CATGGTCGATATCTTGAATTTGCCAGCCAAAATTCAAAGTCTTGCGCGAACTGTATCCGAACGATATCCTTATGACGAAAAATCGTCGTTTTCGATTACCATT  
ATCATCGAAAAACCTTTACCTCGATCACCGACAACGACCGCGGTTTACGATCAAAAAGCTGGCCGAGCTGGTCAAGGAAGGCCGCTTCAATGATTTTCGGCAAAG  
AATTCGCTCGCCGGTTCATGTCACCTTGTGCGCGCCGCCGAAGGTTTGGTCAAAAATCGGCAAGGCCATACCGAAATGACCGTCGCTTGGCGGAATTGGCCA  
ATTTGGTCCGATTACGACGATTTGCGAAATGATGGGCGATGACGGCAATGCGATGTCGAAAAACGAAACGAAACGCTATGCCGAAAAACATAATCTGATTATT  
TAAGCGGCGAAGAAATCATCAATTATTATTTGGATAAATATCTGAAAGAC

---

*dxr* (*M. alcaliphilum*  
20Z)

ATGAAAGGTATTTGTATTTTGGGCGCGACCGGTTCTATCGGTGTCAGCACGCTGGATGTGGTTGCTCGCCATTGCAATCGGTATAGAGTCTGCTTGACCGCG  
AACAATAATATCGACCTGCTGTACGACCAATGCATCGTCCATGCTCCTGACTATGTTGTCGTGGTTGATGAAAATAAGGCTAAACAATTTGCAGAGCGCATTGCTA  
CATCGCCGGTATCCGATATAAAGGTGTTATCGGGAGCCGAATCGTTGACGAAAGTACTGACTGATGTTGATTGCGGTAATGGCGGCAATCGTCGGCGCG  
GCTGGTCTATTACCAACTTTGGCGGCTGCTAAAGCCGGTAAAACCGTATTGCTGGCAAATAAAGAAGCGTTGGTGATGTCGGCGGATTTTTTATGAAAGCGGTT  
ACCGAGTCCGGTGCCATTTGCTGCCGATCGATAGCGAGCATAATGCCATTTTTCAATGCATGCCGGCAGATTACTGTGCGGGTCAAGAGGCTAAGGAGGCGCG  
GCGAATTTTGTGACTGCCTCGGGTGGCCCGTTGAGAATAAGCCGTTAGAAGAGTTGGTTCGATGTCACTCCGGATCAAGCCGTCGCGCATCCGAATTTGGGATAT  
GGGGCGTAAGATTTCTGTCGATTCTGCGACGATGATGAATAAAGGGCTTGAATTTGATTGAAGCCTGTTTATTGTTCAATATGTCGCCGGATAAAAATTCAGGTGGT  
GATCCATCCGAAAAGCGTGATTCAATGTTGCGATTATGTCGACGGCACTGTGTTGGCCAAATGGGTAACCCCGATATGCGAATACCCATTGCGCATGCGAT  
GGCGTGGCCGGAACGCTTCGACTCCGGTGGCGCCGCTGAATATATTCGACGTTAAGCACATGGATTTGCAACCAACCCGATCTTCAGCGTTTCCCTGTTTACGC  
TTGGCGATTGAAGCCGTCGAGGCGAGGCGGTTATTATGCCGGCTGTGTTAAATGCCGCTAATGAAATCGCGGTTGCTGCTTTTTGGACGAGAAAAGTCCGTTTTACC  
GACATCCCTTACATTATTGAACGAGCATGCATCAATTCGAAGCCGATCCGGCGGATACGCTGGATATTGTATTGGCAGCCGATAGCAAAGCCCGGGAAGTGGCT  
GAGCGTATCGTCGAAGAACTTAAGCGTTAA

---

Table S4. The production of indigo and farnesene in previous studies. (n.d: not determined)

| Host strain                  | Product   | Substrate                                | Culture conditions                                                                                                                     | Titer      | Production yield      | References                  |
|------------------------------|-----------|------------------------------------------|----------------------------------------------------------------------------------------------------------------------------------------|------------|-----------------------|-----------------------------|
| <i>E. coli</i>               | Indigo    | Tryptophan (1.0 g/L)                     | Optimized medium (3.55 g/L NaCl, 5.12 g/L yeast extract); Batch culture                                                                | 307.4 mg/L | n.d                   | Dai et al. <sup>5</sup>     |
| <i>E. coli</i>               | Indigo    | Tryptophan                               | Tryptophan medium (2 g/L tryptophan, 5 g/L yeast extract, 10 g/L NaCl); Continuous fermentation, 3000 L                                | 911 mg/L   | 0.234 mg/g tryptophan | Han et al. <sup>6</sup>     |
| <i>E. coli</i>               | Indigo    | Glycerol (5 g/L)<br>Tryptophan (0.5 g/L) | M9 medium; Consortium cultivation; Batch fermentation.                                                                                 | 104.3 mg/L | n.d                   | Chen et al. <sup>7</sup>    |
| <i>M. alcaliphilum</i> 20Z   | Indigo    | Methane (176 mg)                         | NMS medium; Fed-batch culture, 50 mL                                                                                                   | 3.5 µg/L   | 0.994 ug/g methane    | This study                  |
| <i>M. alcaliphilum</i> 20Z   | Indigo    | Methane (135 mg)<br>Xylose (641 mg)      | NMS medium; Semi fed-batch culture, 50 mL                                                                                              | 6.3 µg/L   | 0.421 ug/g substrates | This study                  |
| <i>S. cerevisiae</i>         | Farnesene | Cane syrup                               | Culture medium (15 g/L NH <sub>4</sub> H <sub>2</sub> PO <sub>4</sub> , trace element, vitamin); Fed-batch fermentation, 250 mL        | 130 g/L    | 143 mg/g glucose      | Meadows et al. <sup>8</sup> |
| <i>Yarrowia lipolytica</i>   | Farnesene | Glucose                                  | Modified YPD medium (50 g/L glucose, 20 g/L tryptone, 10 g/L yeast extract); Fed-batch fermentation, 800 mL                            | 25.55 g/L  | n.d                   | Liu et al. <sup>9</sup>     |
| <i>S. elongatus</i> PCC 7942 | Farnesene | CO <sub>2</sub>                          | BG-11 medium (10 mM MOPS, 5% CO <sub>2</sub> , 100 µE/(m <sup>2</sup> s) continuous fluorescent light); Fed-batch fermentation, 100 mL | 12.99 mg/L | n.d                   | N.P. et al. <sup>10</sup>   |
| <i>M. alcaliphilum</i> 20Z   | Farnesene | Methane (140 mg)                         | NMS medium; Fed-batch culture, 50 mL                                                                                                   | 48.98 mg/L | 17.49 mg/g methane    | This study                  |
| <i>M. alcaliphilum</i> 20Z   | Farnesene | Methane (130 mg)<br>Xylose (740 mg)      | NMS medium; Semi fed-batch culture, 50 mL                                                                                              | 91.55 mg/L | 5.26 mg/g substrates  | This study                  |

## References

1. A. W. Puri, S. Owen, F. Chu, T. Chavkin, D. A. Beck, M. G. Kalyuzhnaya and M. E. Lidstrom, *Appl. Environ. Microbiol.*, 2015, **81**, 1775-1781.

2. A. D. Nguyen, T. H. T. Chau and E. Y. Lee, *Chemical Engineering Journal*, 2021, **420**, 127632.
3. A. D. Nguyen, D. N. Pham, T. H. T. Chau and E. Y. Lee, *Microorganisms*, 2021, **9**, 1236.
4. D. N. Pham, D. H. A. Mai, A. D. Nguyen, T. H. T. Chau and E. Y. Lee, *Chemical Engineering Journal*, 2022, **429**, 132522.
5. C. Dai, Q. Ma, Y. Li, D. Zhou, B. Yang and Y. Qu, *Bioprocess and biosystems engineering*, 2019, **42**, 1963-1971.
6. G. H. Han, S. E. Bang, B. K. Babu, M. Chang, H.-J. Shin and S. W. Kim, *Process biochemistry*, 2011, **46**, 788-791.
7. T. Chen, X. Wang, L. Zhuang, A. Shao, Y. Lu and H. Zhang, *Microbial cell factories*, 2021, **20**, 1-11.
8. A. L. Meadows, K. M. Hawkins, Y. Tsegaye, E. Antipov, Y. Kim, L. Raetz, R. H. Dahl, A. Tai, T. Mahatdejkul-Meadows and L. Xu, *Nature*, 2016, **537**, 694-697.
9. Y. Liu, X. Jiang, Z. Cui, Z. Wang, Q. Qi and J. Hou, *Biotechnology for biofuels*, 2019, **12**, 1-11.
10. N. Pattharaprachayakul, H. J. Lee, A. Incharoensakdi and H. M. Woo, *Journal of agricultural and food chemistry*, 2019, **67**, 13658-13664.
